# Supplementary material
Source: Springer Nature journal article supplement (https://www.springermedizin.de/resource/supplementary/13075_2010_2873_MOESM9_ESM.pdf/9693080)

# Day 8

# Day 15

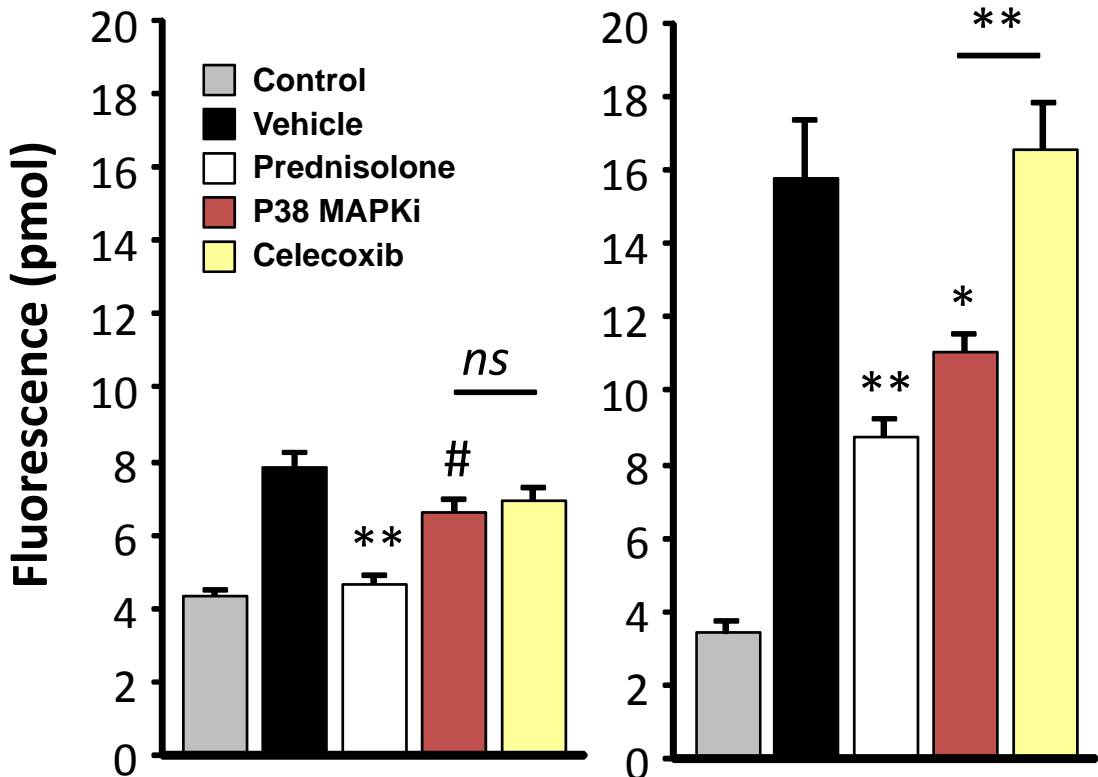

Supplement: MOESM9 [file 9693080]
